# Supplementary material for: Pure 2H phase MoSe2 nanosheets promote the formation of a porous PbI2 film and modulate residual stress for highly efficient and stable perovskite solar cells
Source: Royal Society of Chemistry journal article supplement (doi:10.1039/d3tc01076g), 2023-01-01
Supplement: d3tc01076g1.pdf [file d3tc01076g1.pdf]

## Supporting Information

### Pure 2H Phase MoSe<sub>2</sub> Nanosheets Promote Formation of Porous PbI<sub>2</sub> Film and Modulate Residual Stress for Highly Efficient and Stable Perovskite Solar Cells

Huimin Yang,<sup>a</sup> Yang Hao,<sup>a\*</sup> Jingkun Ren<sup>a</sup>, Yukun Wu,<sup>a</sup> Qinjun Sun<sup>a</sup>, Chenxi Zhang<sup>a</sup>, Yanxia Cui,<sup>a</sup>

Yuying Hao<sup>a\*</sup>

<sup>a</sup>College of Physics and Optoelectronics, Key Lab of Advanced Transducers and Intelligent

Control System, Taiyuan University of Technology, Taiyuan 030024, China, Shanxi-Zheda

Institute of Advanced Materials and Chemical Engineering, Taiyuan 030000, China.

\*Corresponding author. E-mail address: haoyang@tyut.edu.cn, haoyuying@tyut.edu.cn

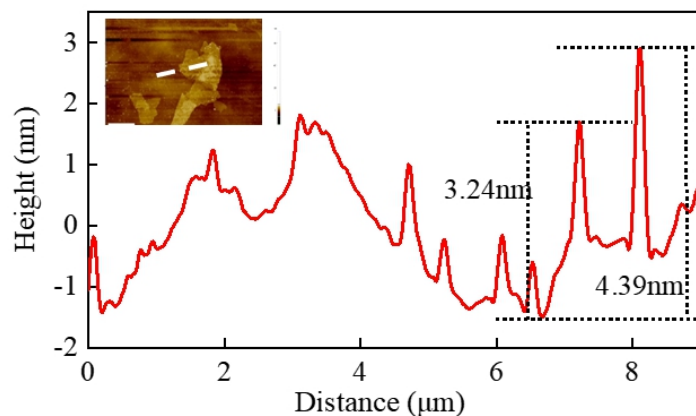

Figure S1. Height profiles of 2D MoSe<sub>2</sub> nanosheets and the AFM images (shown in the inset)

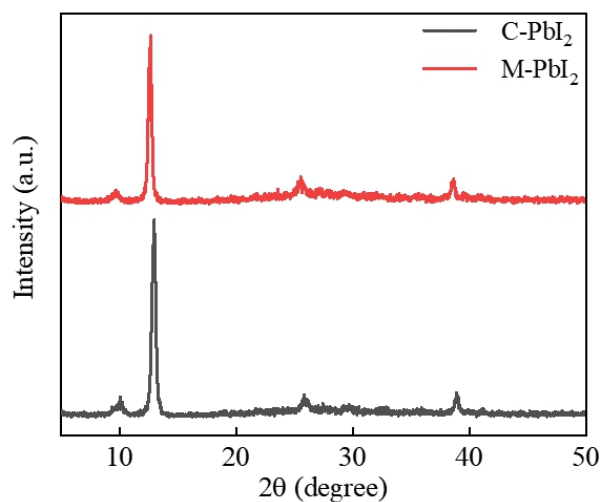

Figure S2. XRD patterns of the C-PbI<sub>2</sub> film and M-PbI<sub>2</sub> film.

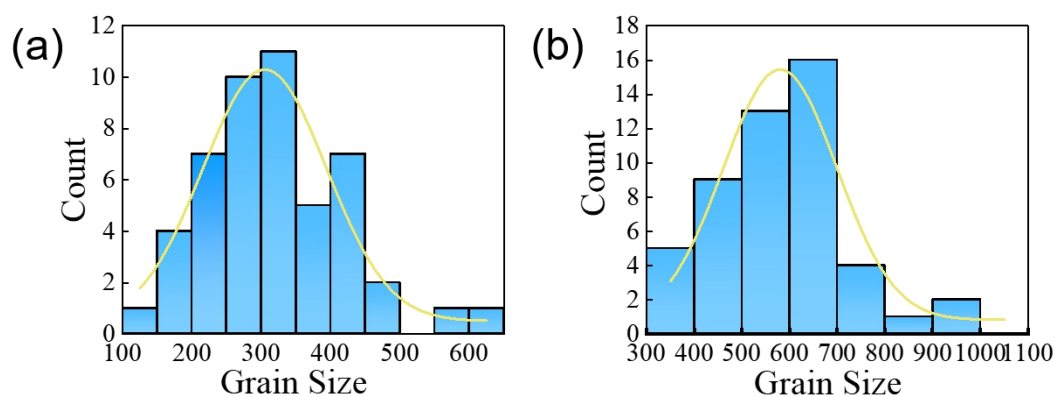

Figure S3. The corresponding grain size statistic distribution graph extracted from SEM top-view image.

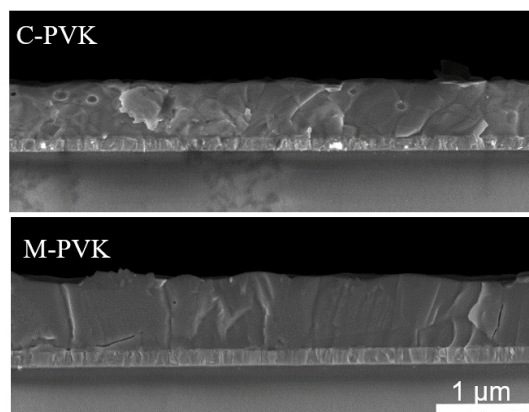

Figure S4. Cross-sectional SEM images of C-PVK film and M-PVK film.

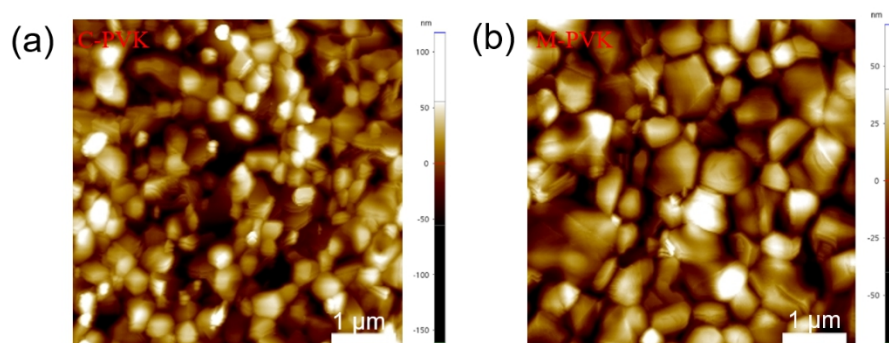

Figure S5. AFM image of (a) C-PVK film and (b) M-PVK film.

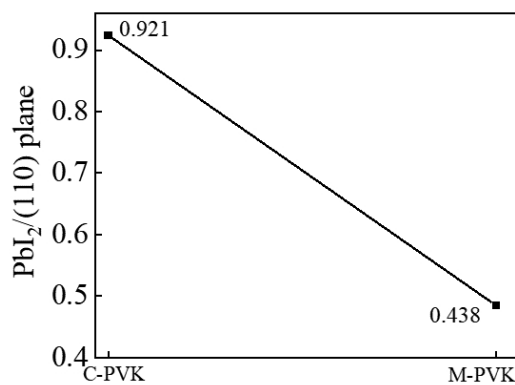

Figure S6. Corresponding peak of XRD ratio of PbI<sub>2</sub>/(110).

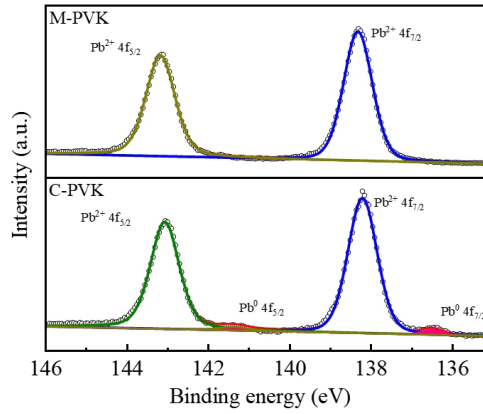

Figure S7. High-resolution XPS spectra of Pb 4f spectra.

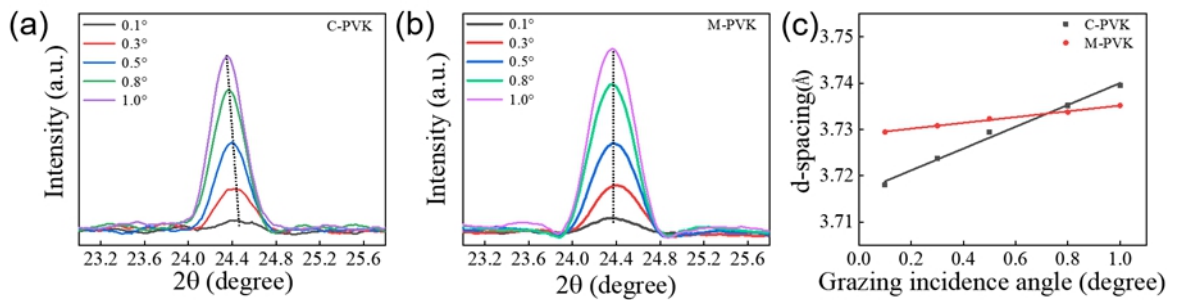

Figure S8. Depth-dependent GIXRD patterns of (a) C-PVK film and (b) M-PVK film. (c) D-spacing values obtained from perovskite (202) plane as a function of incidence angle.

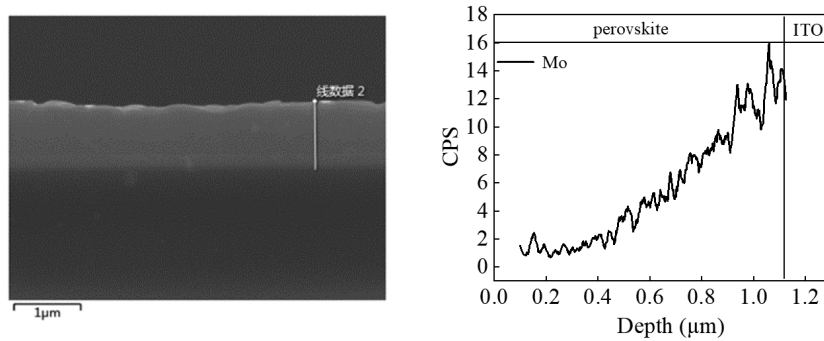

Figure S9. Cross-section of SEM-EDS elemental mapping (Mo) for the M-PVK film.

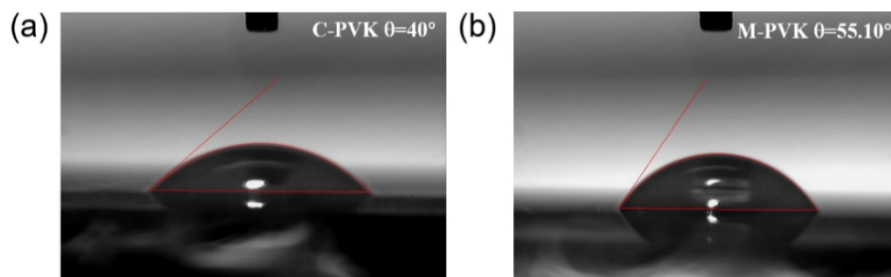

Figure S10. Contact angle of (a) C-PVK film and (b) M-PVK film.

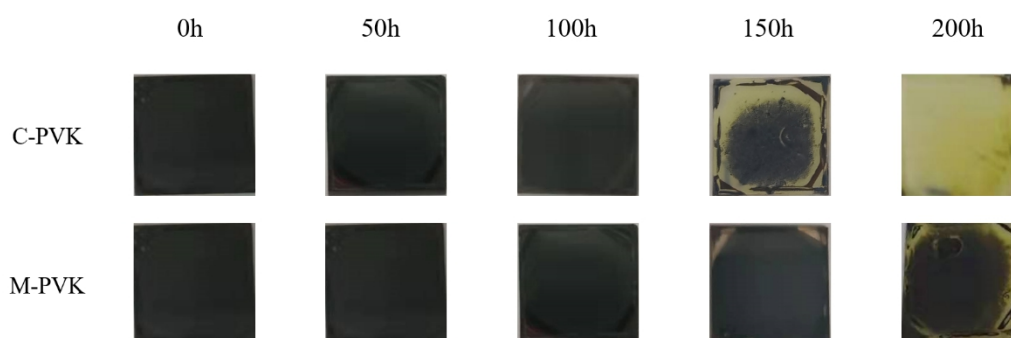

Figure S11. Comparison of the stability of perovskite film stored in ambient air with a 30–40% relative humidity at room temperature.

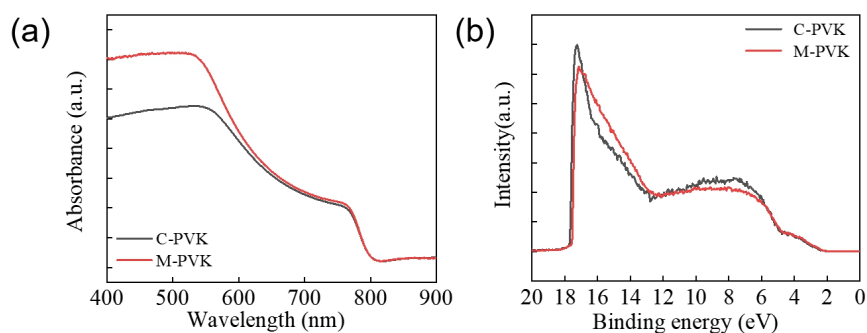

Figure S12. (a) UV-Vis absorption spectra of C-PVK and M-PVK films. (b) Corresponding UPS map of C-PVK film and M-PVK film.

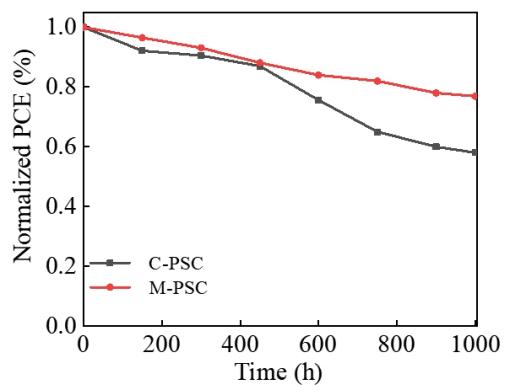

Figure S13. Comparison of the stability of representative unencapsulated solar cells stored in 15-20% humidity at room temperature.

Table S1. Parameters fitted from Nyquist plots measured under dark conditions for C-PSCs and M-PSCs.

|       | $R_s$ | $R_p$  | CPE-T    | CPE-P |
|-------|-------|--------|----------|-------|
| C-PSC | 107.6 | 291870 | 3.00E-09 | 0.972 |
| M-PSC | 60.11 | 569040 | 2.57E-09 | 0.987 |
